# Supplementary material for: Mesoporous silica-supported copper-catalysts for homocoupling reaction of terminal alkynes at room-temperature
Source: Royal Society of Chemistry journal article supplement (doi:10.1039/c3nj41006d), 2013-01-01
Supplement: c3nj41006d.pdf [file c3nj41006d.pdf]

**Mesoporous silica-supported copper-catalysts for homocoupling  
reaction of terminal alkynes at room-temperature**

Hongling Li, Min Yang,\* Xia Zhang, Liang Yan, Jing Li and Yanxing Qi\*

*State Key Laboratory for Oxo Synthesis and Selective Oxidation, Lanzhou Institute of  
Chemical Physics, Chinese Academy of Sciences, Lanzhou, Gansu 730000, P. R. China*

## Supporting information

### Characterization data of products 2a–2h:

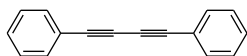

1,4-Diphenylbutadiyne (**2a**)<sup>1</sup>: <sup>1</sup>H NMR (400 MHz, CDCl<sub>3</sub>): δ = 7.54-7.52 (m, 4 H), 7.37-7.32 (m, 6 H).

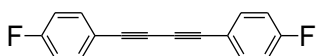

1,4-bis(4-Fluorophenyl)buta-1,3-diyne (**2b**)<sup>1</sup>: <sup>1</sup>H NMR (400 MHz, CDCl<sub>3</sub>): δ = 7.47-7.42 (m, 4 H), 7.00-6.94 (m, 4 H).

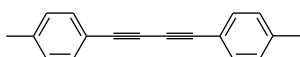

1,4-bis(*p*-methylphenyl)buta-1,3-diyne (**2c**)<sup>2</sup>: <sup>1</sup>H NMR (400 MHz, CDCl<sub>3</sub>): δ = 7.43-7.41 (d, *J* = 8.0 Hz, 4 H), 7.15-7.13 (d, *J* = 8.0 Hz, 4 H), 2.36 (s, 6 H).

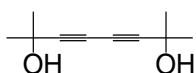

2,7-Dimethyl-3,5-octadiyne-2,7-diol (**2d**)<sup>3</sup>: <sup>1</sup>H NMR (400 MHz, CDCl<sub>3</sub>): δ = 2.01 (s, 2 H), 1.54 (s, 12 H).

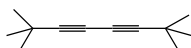

2,2,7,7-Tetramethylocta-3,5-diyne (**2e**)<sup>2</sup>: <sup>1</sup>H NMR (400 MHz, CDCl<sub>3</sub>): δ = 1.22 (s, 18 H).

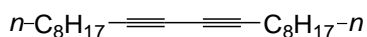

Icosa-9,11-diyne (**2f**)<sup>2</sup>: <sup>1</sup>H NMR (400 MHz, CDCl<sub>3</sub>): δ = 2.27-2.24 (t, *J* = 7.0 Hz, 4 H), 1.55-1.48 (m, 4 H), 1.41-1.36 (m, 4 H), 1.32-1.27 (m, 16 H), 0.90-0.86 (t, *J* = 6.8 Hz, 6 H).

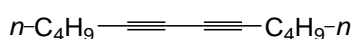

Dodeca-5,7-diyne (**2g**)<sup>4</sup>: <sup>1</sup>H NMR (400 MHz, CDCl<sub>3</sub>): δ = 2.26-2.22 (t, *J* = 7.0 Hz, 4 H), 1.56-1.50 (m, 4 H), 1.48-1.37 (m, 4 H), 0.92-0.89 (t, *J* = 7.2 Hz, 6 H).

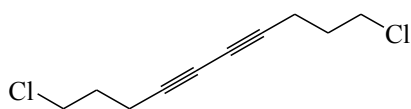

1,10-dichlorodeca-4,6-diyne (**2h**)<sup>5</sup>: <sup>1</sup>H NMR (400 MHz, CDCl<sub>3</sub>): δ = 3.66-3.63 (t, *J* = 6.2 Hz, 4 H), 2.48-2.46 (t, *J* = 6.8 Hz, 4 H), 2.04-1.95 (m, 4 H).

#### Characterization data of products 2–4:

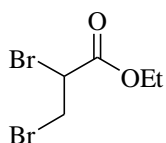

ethyl 2,3-dibromopropanoate **2f**: <sup>1</sup>H NMR (400 MHz, CDCl<sub>3</sub>): δ = 4.43 (dd, *J* = 11.2, 4.4 Hz, 1 H), 4.30 (q, *J* = 7.2 Hz, 2 H), 3.93 (dd, *J* = 10.6, 4.4 Hz, 1 H), 3.68 (dd, *J* = 10.0, 4.4 Hz, 1 H), 1.33 (t, *J* = 7.2 Hz, 3 H).

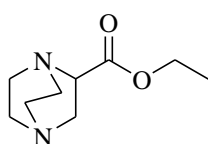

ethyl 1,4-diaza-bicyclo[2.2.2]octane-2-carboxylate **3**:  $^1\text{H}$  NMR (400 MHz,  $\text{CDCl}_3$ ):  $\delta$  = 4.25 (q,  $J$  = 7.2 Hz, 2 H), 3.47 (t,  $J$  = 8.4 Hz, 1 H), 2.66-3.13 (m, 10 H), 1.31 (t,  $J$  = 7.2 Hz, 3 H);  $^{13}\text{C}$  NMR (100.6 MHz,  $\text{CDCl}_3$ ):  $\delta$  = 171.71, 60.92, 57.11, 49.23, 48.60, 46.68, 46.12, 42.69, 14.13; LRMS (EI, 70 eV):  $m/z$  (%) = 184 ( $\text{M}^+$ , 100).

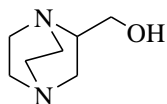

1,4-diaza-bicyclo[2.2.2]octan-2-ylmethanol **4**:  $^1\text{H}$  NMR (400 MHz,  $\text{CDCl}_3$ ):  $\delta$  = 3.79 (s, 1 H), 3.64-3.59 (m, 2 H), 3.48 (dd,  $J$  = 12.0, 4.4 Hz, 1 H), 2.98-2.56 (m, 10 H);  $^{13}\text{C}$  NMR (100.6 MHz,  $\text{CDCl}_3$ ):  $\delta$  = 61.48, 56.23, 49.86, 49.14, 47.10, 46.29, 40.26; LRMS (EI, 70 eV):  $m/z$  (%) = 142 ( $\text{M}^+$ , 100).

## References

- [1] X. Lu, Y. Zhang, C. Luo and Y. Wang, *Synth. Commun.* 2006, **36**, 2503.
- [2] J.H. Li, Y. Liang and Y. X. Xie, *J. Org. Chem.* 2005, **70**, 4393.
- [3] A. Lei, M. Srivastava and X. Zhang, *J. Org. Chem.* 2002, **67**, 1969.
- [4] B. C. Zhu and X. Z. Jiang, *Appl. Organomet. Chem.* 2007, **21**, 345.
- [5] M. Ochiai, Y. Nishi, S. Goto and H. J. Frohn, *Angew. Chem. Int. Ed.* 2005, **44**, 406.
- [6] S. D. Sharma, S. Kanwar and S. Rajpoot, *J. Heterocyclic Chem.* 2006, **43**, 11.
